# Supplementary material for: A new tropospheric tomography model combining the pixel-based and function-based models
Source: Copernicus journal article supplement (doi:10.5194/angeo-2018-34), 2018-05-23
Supplement: Supplementary file [file angeo-2018-34-RC2-supplement.pdf]

## Angeo-2018-34

Function-based tomography is one of the most important issues in the field of GNSS. This paper addresses this issue. But the method described in this paper is still dependent on high precision voxel-based tomography. This paper can be published after major revision. Because the authors have written and discussed the subject well.

- 1- Why did the authors use the polynomial function for this purpose?
- 2- Due to the important role of the voxel-based tomography technique in this method, the use of the term "function-based tomography" may lead to misinterpretation. For this reason, it is recommended that the title of the paper be changed.
- 3- Why the results have not been compared with the radiosonde observations?
- 4- Due to the importance of the issue, the authors should draw up and compare the results obtained from the two methods.
- 5- References need to be revised. For example, (adavi and mashhadi-hossainali, 2015) is not a valid and appropriate reference. Also, there are no valid and new articles on tomography and its accuracy in the list of resources (except self citations).
